# Supplementary material for: A Regional multi-Air Pollutant Assimilation System (RAPAS v1.0) for emission estimates: system development and application
Source: Copernicus journal article supplement (doi:10.5194/gmd-16-5949-2023), 2023-10-20
Supplement: Supplementary file 1 [file gmd-16-5949-2023-supplement.pdf]

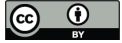

*Supplement of*

**A Regional multi-Air Pollutant Assimilation System (RAPAS v1.0)  
for emission estimates: system development and application**

**Shuzhuang Feng et al.**

*Correspondence to:* Fei Jiang (jiangf@nju.edu.cn)

The copyright of individual parts of the supplement might differ from the article licence.

## Text S1

Figure S3 shows the analysis increments (assimilation minus control) of the 6 species averaged over all initializations. It could be found that the impact of 3DVAR is not only concentrated around the measurement sites, but also transported to downwind areas as discussed in Feng et al. (2018). The longer a species lives, the farther the assimilation benefits are transmitted (e.g., CO). The positive (negative) increments indicate underestimated (overestimated) emissions in local or upwind areas. Specifically, the positive increments of CO and PMC are generally distributed nationwide, especially in the northern part of China, indicating that the emissions of CO and PMC over the mainland China were estimated, which may be related to the underestimated residential sources (e.g., coal heating) (Zhi et al., 2017) and local dust caused by higher wind speeds, respectively. For SO<sub>2</sub>, NO<sub>2</sub> and PM<sub>2.5</sub>, the negative increments are mainly located in the North China Plain (NCP), the Yangtze River Delta (YRD), and the Sichuan Basin (SCB), as well as Central China, and the significant positive increments mainly correspond with resource-abundant northern regions (e.g., Northeast China, Northwest China, etc.). The increments of PM<sub>2.5</sub> are related not only to inaccurate emissions but also to the concentration biases of its precursor, which can affect the biases of PM<sub>2.5</sub> in downwind areas to some extent. The increments of O<sub>3</sub> are negatively correlated with those of NO<sub>2</sub> in terms of their spatial distribution because of strong NO-titration during the winter (Huang et al., 2020; Shi and Brasseur, 2020).

## Text S2

In the EnKF-based inverse estimation scheme, the uncertainty is represented by the spread of the ensemble samples (Tang et al., 2013). The posterior and prior uncertainties are the standard deviations of the prior and posterior perturbations of  $\mathbf{X}_i^b$  and  $\mathbf{X}_i^a$ .  $\mathbf{X}_i^b$  was perturbed from the prior emissions  $\mathbf{X}_0^b$  by adding a randomly perturbed item of  $\delta\mathbf{X}_i^b$ , which was drawn from Gaussian distributions with a mean of zero and the standard deviation of the prior emission uncertainty in each grid. After constrained using observations, the perturbed emissions of  $\mathbf{X}_i^b$  is changed to  $\mathbf{X}_i^a$  according to Eq. 2 ~ 5.

$$\mathbf{X}_i^b = \mathbf{X}_0^b + \delta\mathbf{X}_i^b, i = 1, 2, \dots, N \quad (1)$$

$$\mathbf{X}_i^a = \mathbf{X}^a + (\mathbf{X}_i^b - \mathbf{X}^b) - \tilde{\mathbf{K}}\mathbf{H}(\mathbf{X}_i^b - \mathbf{X}^b) \quad (2)$$

$$\tilde{\mathbf{K}} = \left(1 + \sqrt{\mathbf{R}/(\mathbf{H}\mathbf{P}^b\mathbf{H}^T + \mathbf{R})}\right)^{-1} \mathbf{K} \quad (3)$$

$$\mathbf{K} = \mathbf{P}^b\mathbf{H}^T(\mathbf{H}\mathbf{P}^b\mathbf{H}^T + \mathbf{R})^{-1} \quad (4)$$

$$\mathbf{P}^b = \frac{1}{N-1} \sum_{i=1}^N (\mathbf{X}_i^b - \bar{\mathbf{X}}^b) (\mathbf{X}_i^b - \bar{\mathbf{X}}^b)^T \quad (5)$$

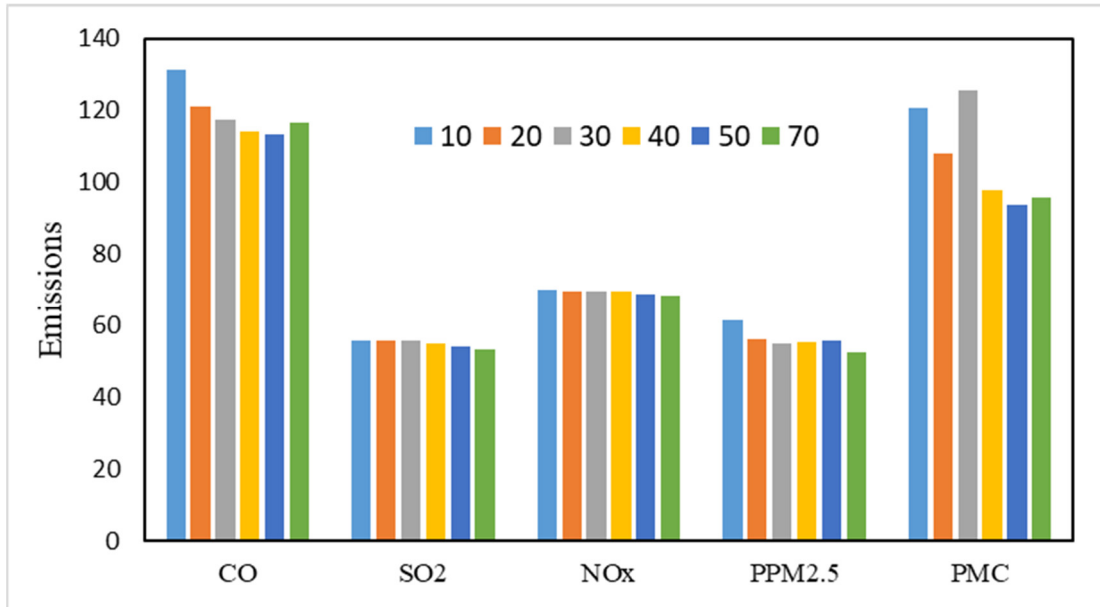

**Figure S1** Comparison of emissions of different species inferred by selecting different ensemble numbers. CO unit:10 Gg; others units: Gg.

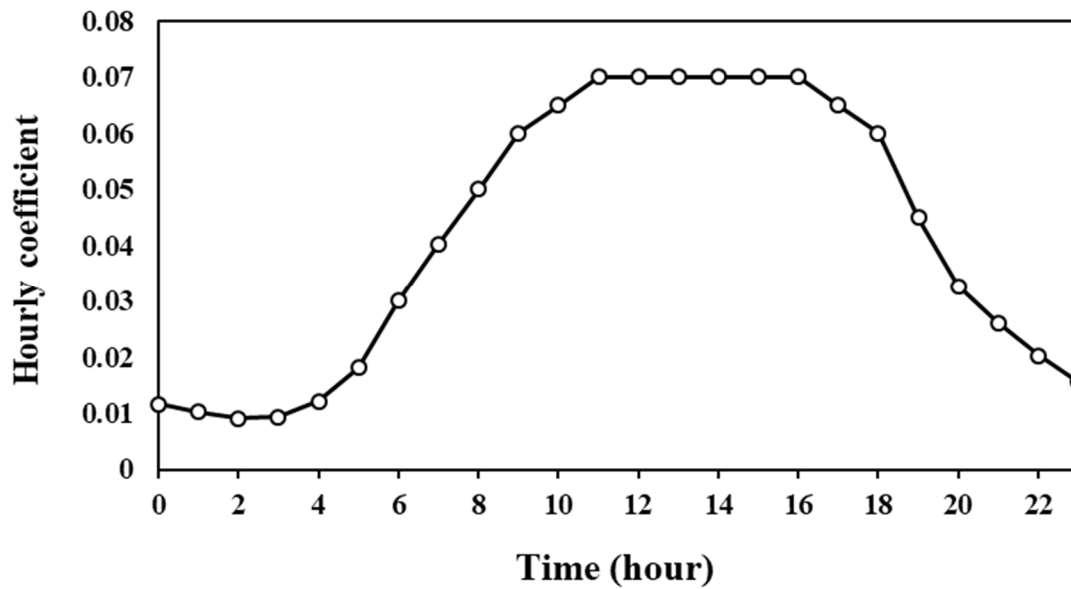

**Figure S2.** Hourly emission variabilities.

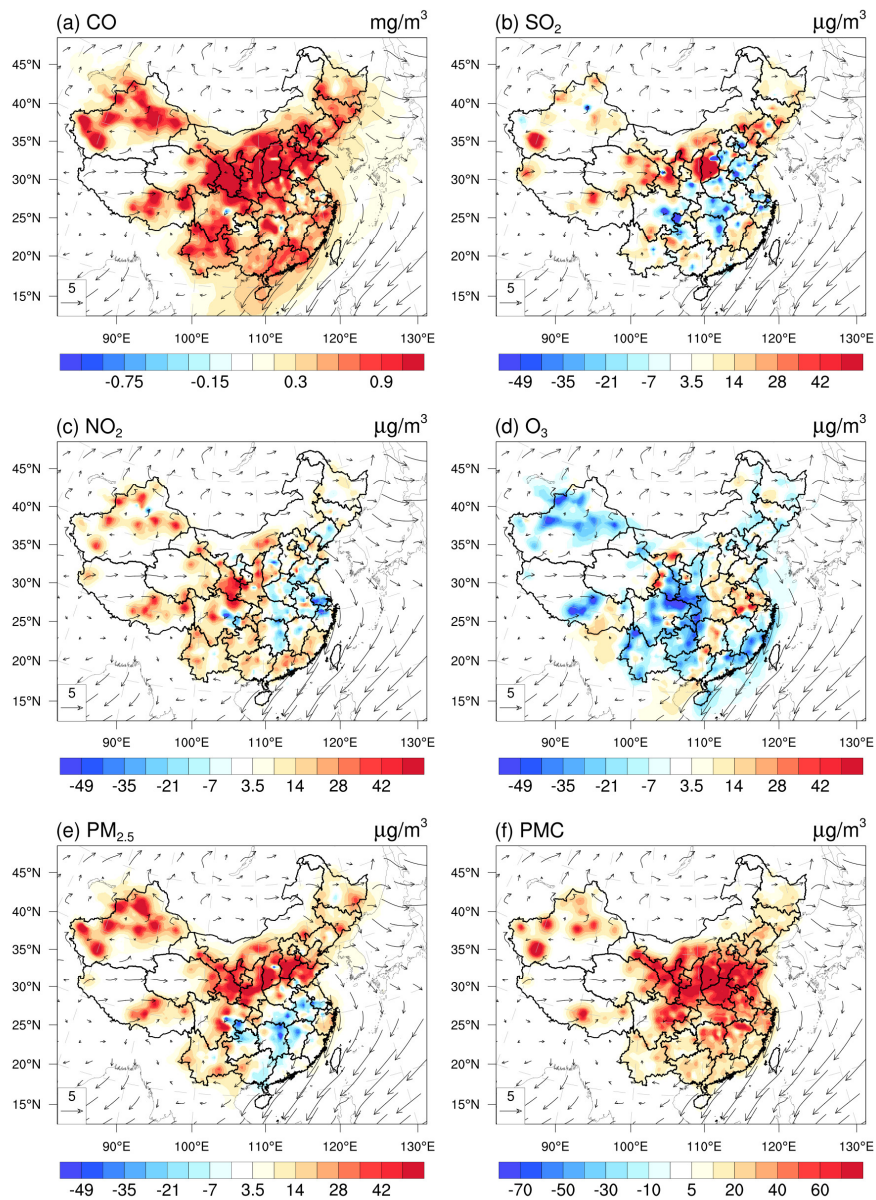

**Figure S3.** Mean differences of the background and analysis fields of (a) CO, (b) SO<sub>2</sub>, (c) NO<sub>2</sub>, (d) O<sub>3</sub>, (e) PM<sub>2.5</sub> and (f) PMC at the lowest model level (analysis fields minus background fields). All data are averaged using the fields at 0000, 0600, 1200, and 1800 UTC during the period of 27 to 01 December, 2016.

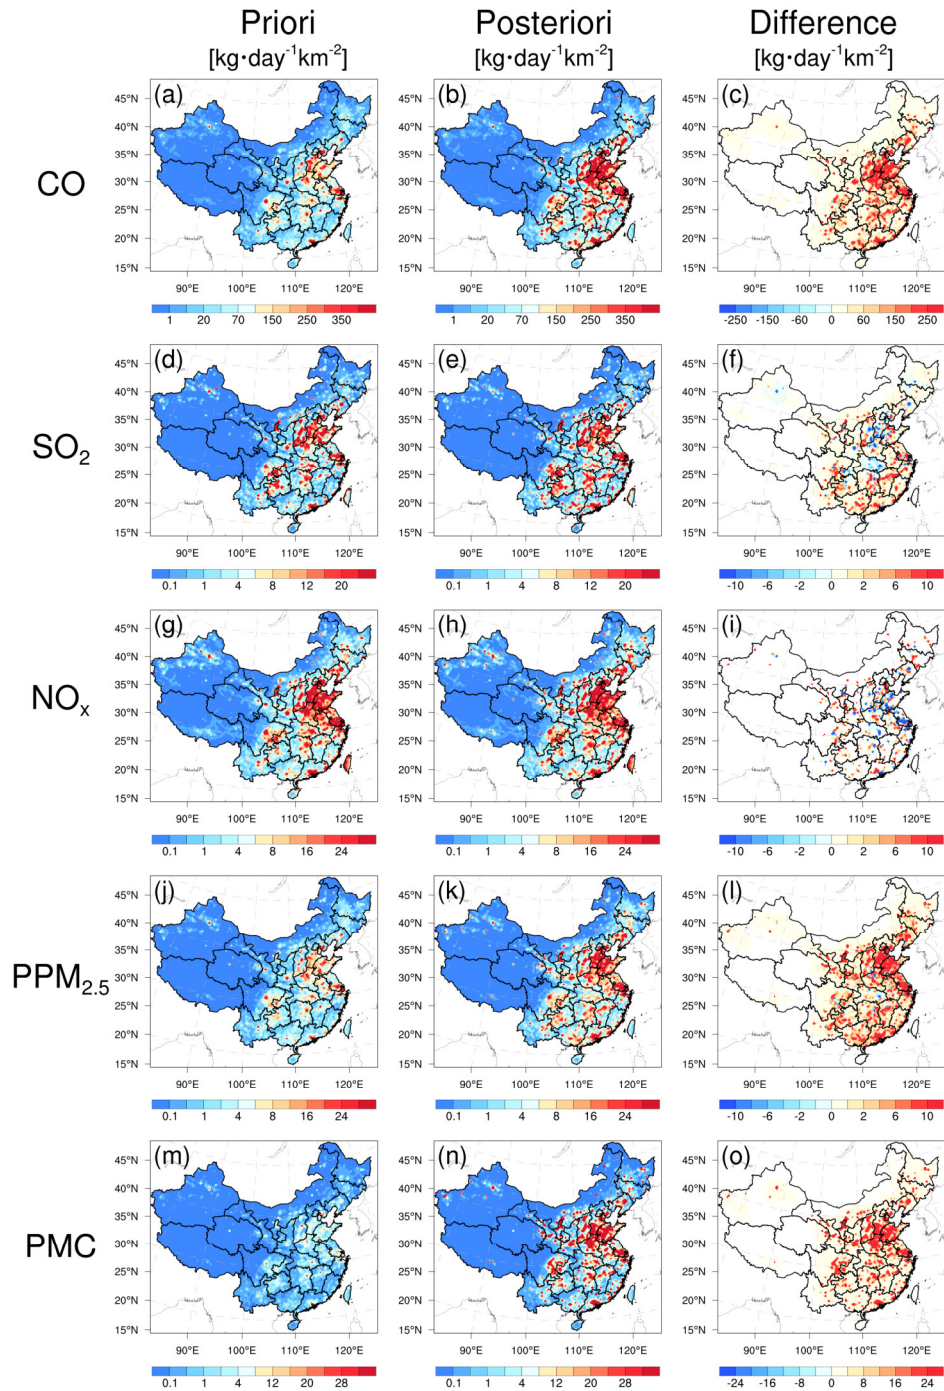

**Figure S4.** Spatial distribution of the time-averaged prior emissions (left column, MEIC 2016), posterior emissions (middle column), and differences (right column, posterior minus prior) in July 2016.

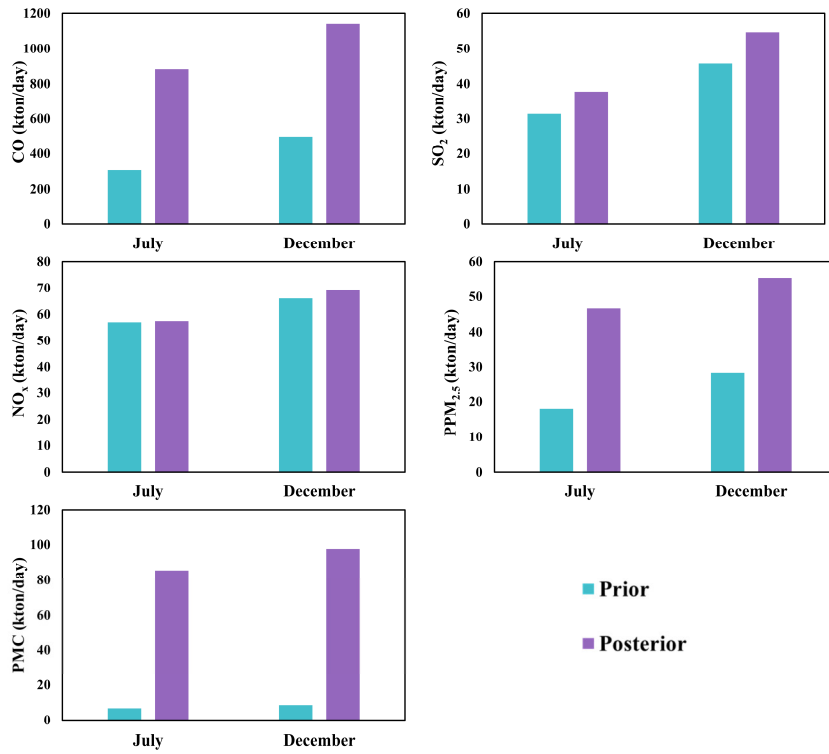

**Figure S5.** The prior and posterior emissions (kton/day) in July and December 2016 over the mainland China.

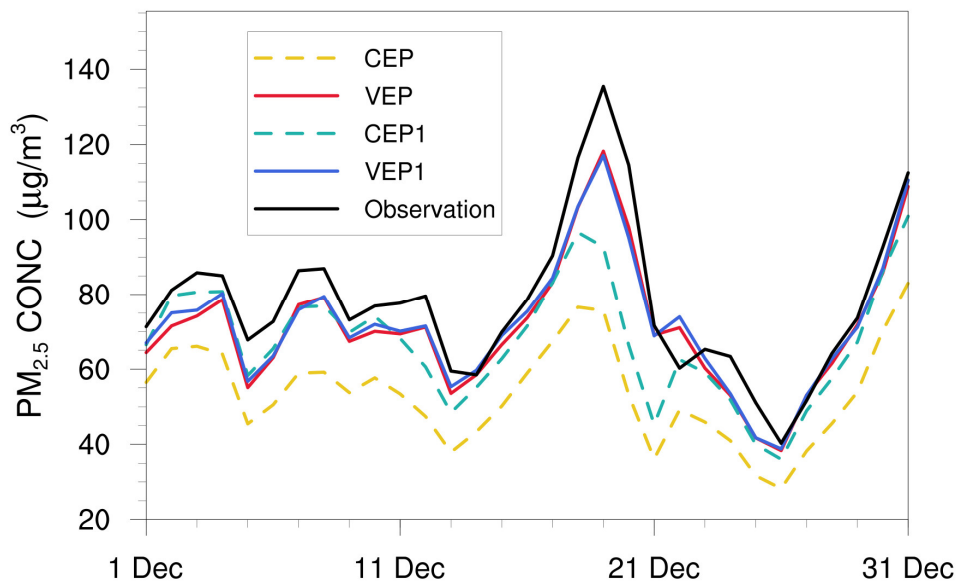

**Figure S6.** Time series of the daily PM<sub>2.5</sub> concentrations (CONC,  $\mu\text{g m}^{-3}$ ) averaged over the whole domain obtained from the observations and simulations. CEP1 and VEP1 represent simulations using prior emissions taken from MEIC 2012 and posterior emissions inferred by EMS1 experiment, respectively.



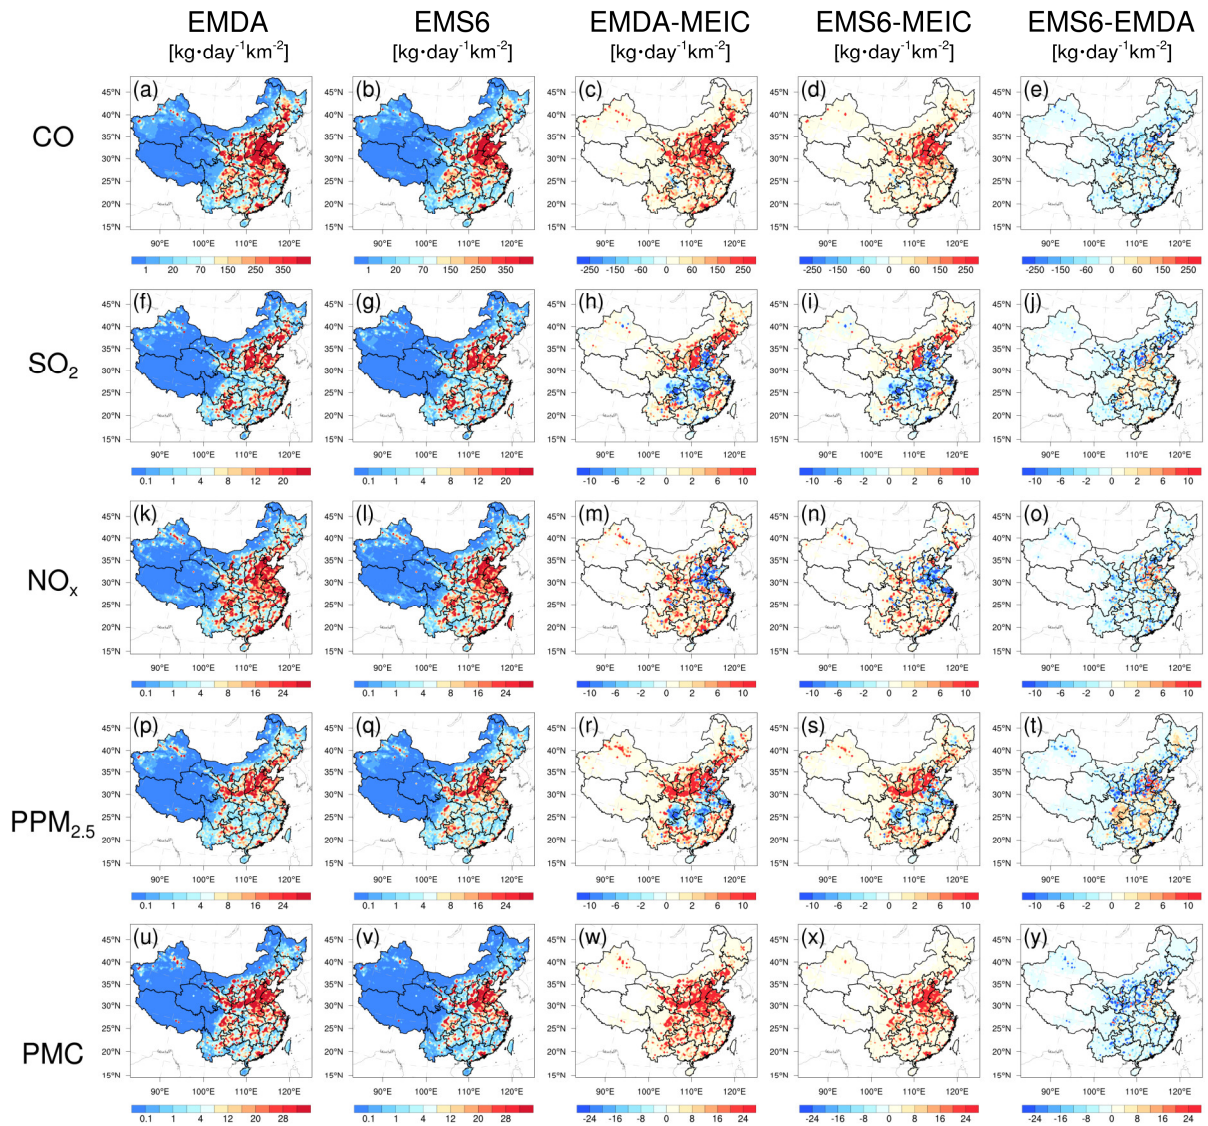

**Figure S7.** Spatial distribution of the time-averaged posterior emissions of EMDA and EMS6, and differences among prior emissions (MEIC) and posterior emissions of EMDA and EMS6.



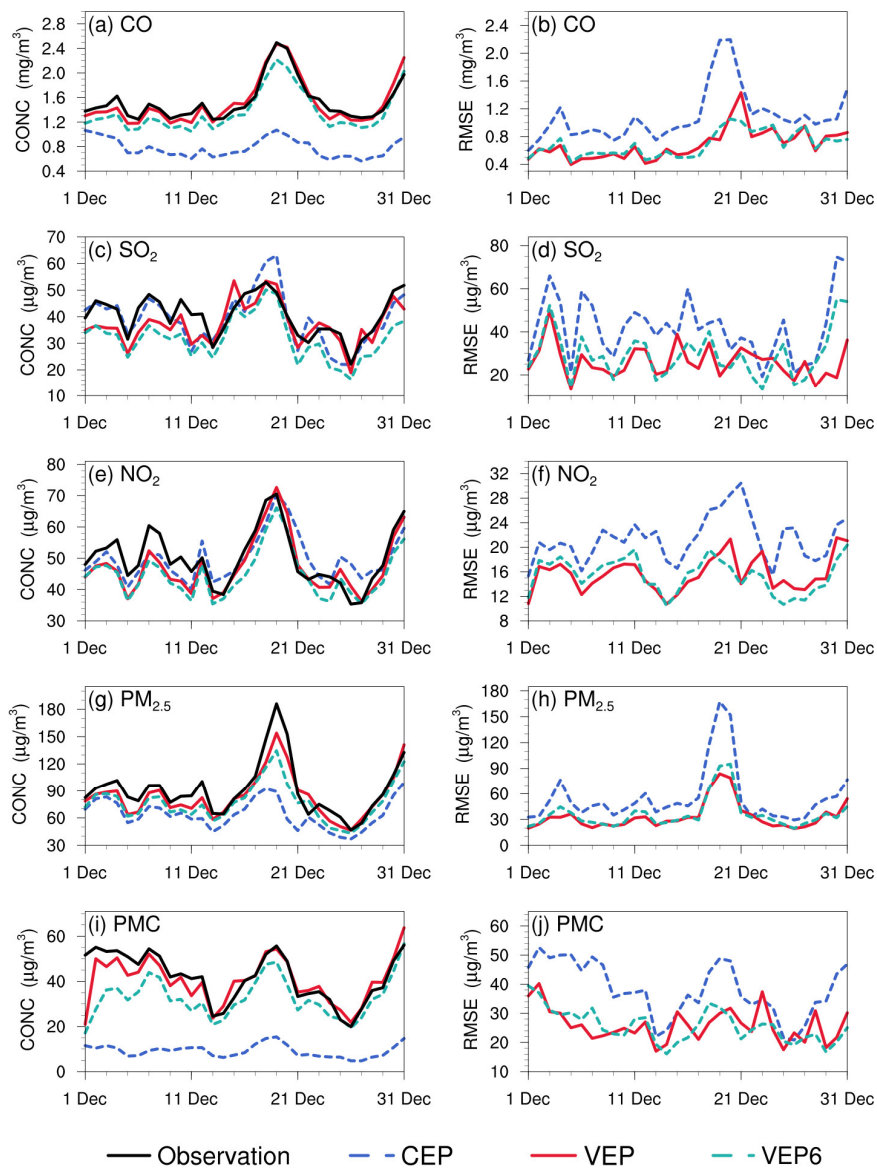

**Figure S8.** Time series of the daily concentrations (CONC, left,  $\mu\text{g m}^{-3}$ ) and root mean square error (RMSE, right,  $\mu\text{g m}^{-3}$ ) obtained from CEP, VEP, and VEP6. The simulations were verified against the independent sites.

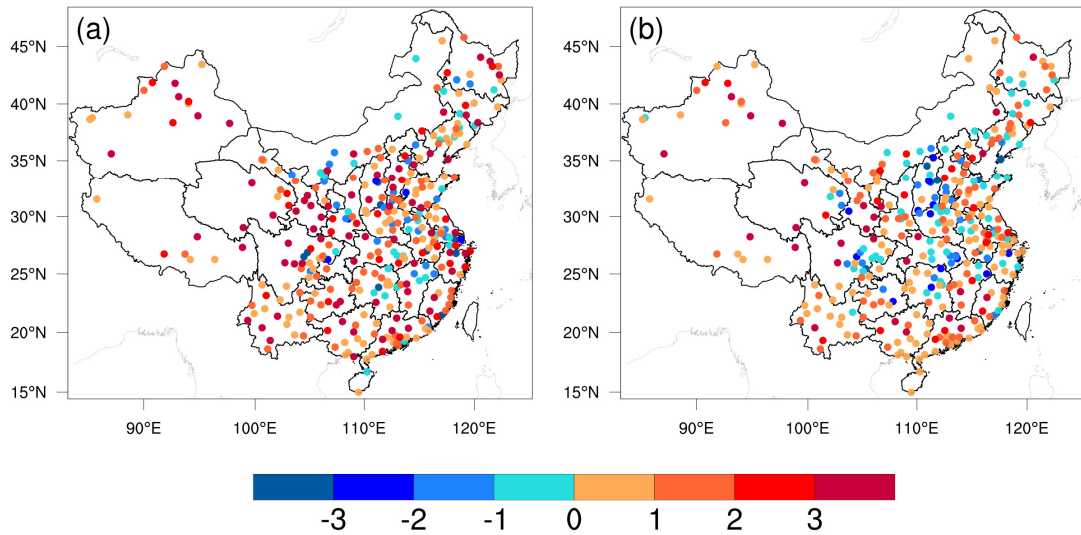

**Figure S9.** Changes of the (a) BIAS ( $\mu\text{g m}^{-3}$ ) and (b) RMSE ( $\mu\text{g m}^{-3}$ ) of the simulated NO<sub>2</sub> between VEP and VEP6 experiments.

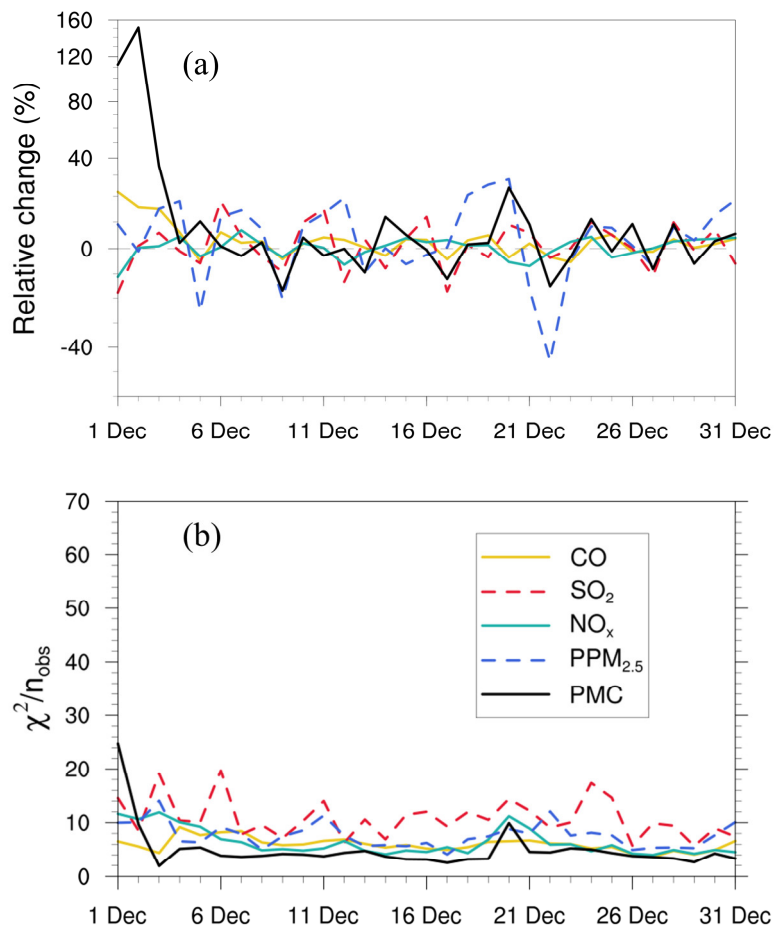

**Figure S10.** Relative changes (a) in a posteriori emission estimates of CO, SO<sub>2</sub>, NO<sub>x</sub>, PPM<sub>2.5</sub> and PMC, and  $\chi^2$  statistics (b) of these state vectors in EMS6 experiment.

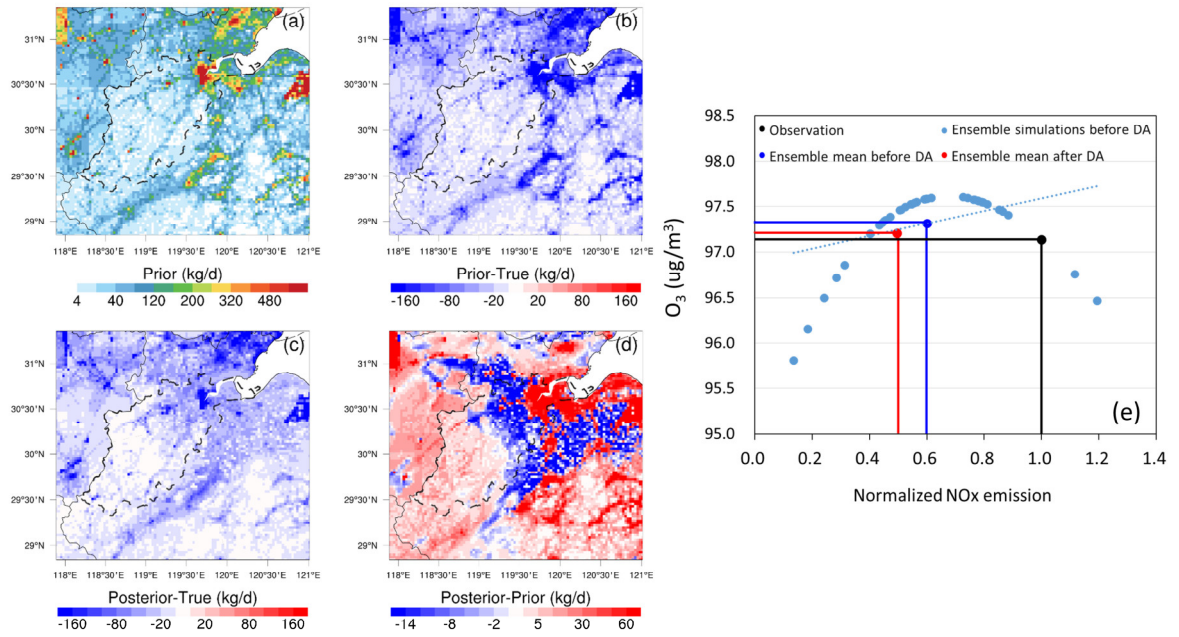

**Figure S11.** Spatial distribution of (a-d) the prior, posterior, ‘true’ emissions, and their differences (kg/d), as well as (e) the changes in  $\text{NO}_x$  emissions and simulated  $\text{O}_3$  concentrations before and after assimilating  $\text{O}_3$  observation. The "true" emissions were reduced by 40% to represent the a priori emissions in the first OSSE experiment, and a representative grid with a negative  $\text{NO}_x$  adjustment were selected to demonstrate the limitations of assimilating  $\text{O}_3$  in  $\text{NO}_x$  adjustment in the second OSSE experiment.

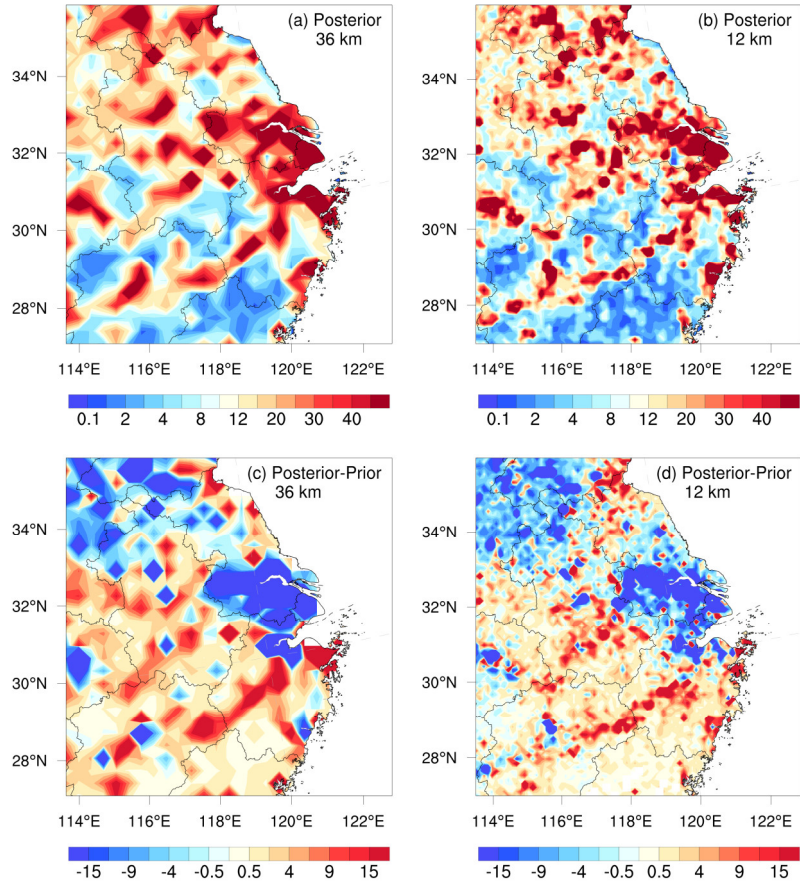

**Figure S12.** Spatial distribution of the time-averaged posterior NO<sub>x</sub> emissions ( $\text{kg day}^{-1} \text{km}^{-2}$ ) and differences between posterior and prior NO<sub>x</sub> emissions (posterior minus prior) at 36 and 12 km resolutions.

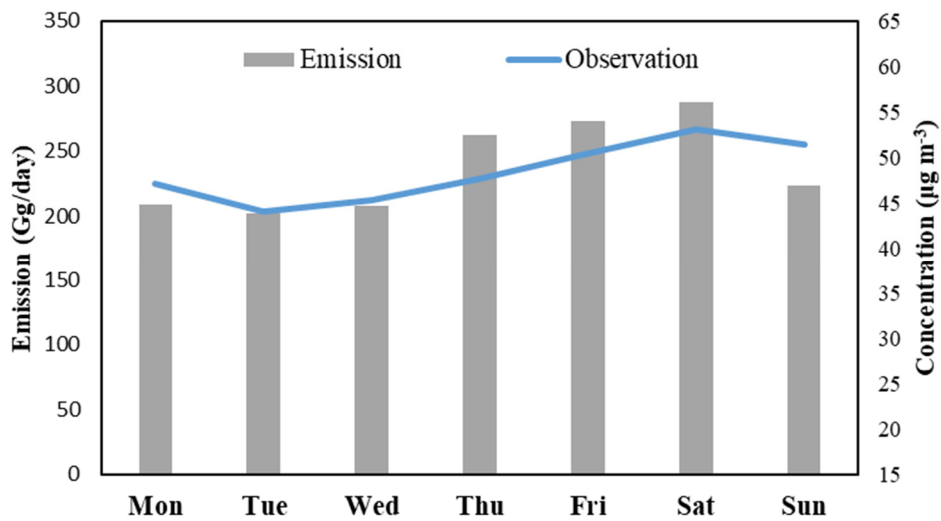

**Figure S13.** Weekly variation in posterior NO<sub>x</sub> emission and NO<sub>2</sub> observation.

**Table S1.** Estimation of posterior emissions (kton/day) and relative changes (%) compared to prior emissions in each province and the mainland China.

| Region       | CO     |       | SO <sub>2</sub> |       | NO <sub>x</sub> |       | PPM <sub>2.5</sub> |       | PMC   |         |
|--------------|--------|-------|-----------------|-------|-----------------|-------|--------------------|-------|-------|---------|
|              | Post.  | Diff. | Post.           | Diff. | Post.           | Diff. | Post.              | Diff. | Post. | Diff.   |
| Mainland     | 1141.9 | 129.4 | 54.7            | 19.7  | 69.4            | 5.1   | 55.4               | 95.4  | 97.6  | 1044.8  |
| Shanghai     | 4.75   | 12.5  | 0.25            | -59.5 | 0.74            | -44.0 | 0.11               | -40.8 | 0.22  | 249.1   |
| Jiangsu      | 37.27  | 30.9  | 1.10            | -23.9 | 2.90            | -38.6 | 0.96               | -34.3 | 2.46  | 529.6   |
| Zhejiang     | 20.15  | 80.3  | 0.59            | -30.0 | 2.68            | 1.9   | 0.86               | 77.9  | 2.15  | 876.9   |
| Anhui        | 32.88  | 69.6  | 0.79            | 21.3  | 2.79            | 1.5   | 1.28               | -3.0  | 2.50  | 495.6   |
| Shandong     | 93.11  | 115.9 | 3.33            | -17.5 | 4.26            | -32.7 | 3.07               | 19.3  | 6.11  | 742.6   |
| Beijing      | 6.34   | 108.4 | 0.06            | -15.7 | 0.35            | 22.0  | 0.23               | 80.7  | 0.19  | 544.3   |
| Tianjin      | 13.40  | 372.2 | 0.11            | -33.6 | 0.59            | 53.3  | 0.23               | 73.7  | 0.35  | 933.0   |
| Hebei        | 125.45 | 158.4 | 3.47            | 10.9  | 5.49            | 1.1   | 6.00               | 176.3 | 8.23  | 1176.7  |
| Shanxi       | 82.17  | 210.9 | 9.93            | 86.9  | 2.88            | -15.4 | 5.66               | 236.1 | 7.20  | 1274.8  |
| Neimenggu    | 59.12  | 231.2 | 5.48            | 135.8 | 3.92            | 29.0  | 2.73               | 163.7 | 7.11  | 2144.3  |
| Henan        | 69.99  | 120.2 | 1.14            | -39.6 | 3.09            | -22.7 | 3.05               | 66.6  | 6.26  | 1008.4  |
| Hunan        | 40.59  | 56.8  | 1.52            | -40.3 | 2.36            | -5.2  | 0.69               | -52.9 | 2.98  | 481.5   |
| Hubei        | 38.80  | 73.1  | 0.57            | -76.5 | 2.27            | -1.9  | 1.17               | -12.1 | 2.32  | 498.7   |
| Jiangxi      | 28.71  | 112.3 | 1.63            | 83.0  | 1.78            | 19.0  | 1.52               | 110.3 | 2.65  | 777.5   |
| Guangdong    | 52.97  | 175.3 | 1.19            | -32.7 | 4.66            | 31.1  | 1.91               | 89.4  | 2.65  | 565.6   |
| Guangxi      | 24.81  | 120.8 | 1.18            | -1.5  | 2.30            | 52.2  | 1.70               | 103.6 | 1.75  | 512.5   |
| Fujian       | 12.22  | 113.8 | 0.81            | 60.3  | 1.91            | 57.8  | 0.75               | 99.0  | 1.35  | 904.3   |
| Hainan       | 1.94   | 20.5  | 0.14            | -10.0 | 0.31            | 6.6   | 0.09               | -17.0 | 0.07  | 106.9   |
| Liaoning     | 49.69  | 175.2 | 4.04            | 178.8 | 2.71            | -5.9  | 1.99               | 94.7  | 3.93  | 1377.3  |
| Heilongjiang | 38.64  | 90.2  | 1.10            | 25.7  | 1.82            | -2.6  | 1.40               | 25.6  | 0.99  | 345.6   |
| Jilin        | 35.61  | 176.2 | 3.36            | 376.2 | 2.46            | 69.2  | 1.72               | 132.1 | 0.87  | 437.8   |
| Shaanxi      | 49.30  | 212.9 | 1.62            | -9.5  | 2.40            | 37.7  | 3.64               | 294.2 | 7.25  | 2750.2  |
| Gansu        | 49.41  | 423.7 | 1.51            | 118.6 | 1.97            | 100.1 | 3.27               | 521.4 | 9.64  | 8264.2  |
| Xinjiang     | 39.94  | 383.4 | 1.48            | 21.0  | 2.69            | 48.2  | 4.29               | 720.3 | 2.69  | 1523.5  |
| Qinghai      | 7.15   | 236.0 | 0.31            | 128.4 | 0.36            | 23.4  | 0.36               | 147.3 | 1.27  | 2948.9  |
| Ningxia      | 14.34  | 523.8 | 1.96            | 129.6 | 1.06            | 16.6  | 1.14               | 478.6 | 2.95  | 3603.5  |
| Sichuan      | 36.88  | 46.3  | 1.11            | -43.2 | 3.20            | 7.4   | 1.66               | 8.1   | 4.54  | 1073.8  |
| Chongqing    | 9.75   | 24.2  | 0.48            | -69.2 | 1.11            | 4.6   | 0.26               | -51.4 | 0.77  | 385.1   |
| Guizhou      | 29.82  | 28.9  | 2.78            | -8.6  | 2.13            | 68.9  | 1.99               | 60.3  | 3.26  | 739.0   |
| Yunnan       | 35.65  | 129.2 | 1.70            | 15.5  | 1.96            | 32.2  | 1.52               | 56.9  | 2.49  | 728.5   |
| Xizang       | 1.07   | 235.3 | 0.004           | 23.1  | 0.26            | 95.7  | 0.13               | 888.7 | 0.46  | 15960.2 |

**Table S2.** Statistics comparing the pollution concentrations from the simulations with prior and posterior emissions against observations for July. CO unit:  $\text{mg m}^{-3}$ ; others units:  $\mu\text{g m}^{-3}$ .

| Species           | Mean Obs. | Mean Sim. |      | BIAS  |       | RMSE |      | CORR |      |
|-------------------|-----------|-----------|------|-------|-------|------|------|------|------|
|                   |           | CEP*      | VEP* | CEP*  | VEP*  | CEP* | VEP* | CEP* | VEP* |
| CO                | 0.79      | 0.33      | 0.63 | -0.46 | -0.16 | 0.58 | 0.35 | 0.25 | 0.65 |
| SO <sub>2</sub>   | 12.9      | 15.6      | 9.6  | 2.7   | -3.3  | 19.7 | 7.2  | 0.12 | 0.71 |
| NO <sub>2</sub>   | 20.0      | 23.0      | 16.5 | 3.0   | -3.5  | 22.0 | 6.8  | 0.47 | 0.81 |
| PM <sub>2.5</sub> | 29.2      | 21.9      | 23.3 | -7.3  | -6.0  | 21.1 | 13.9 | 0.51 | 0.76 |
| PMC               | 53.6      | 27.6      | 42.3 | -26.0 | -11.3 | 42.3 | 30.9 | 0.38 | 0.61 |

\* BIAS, mean bias; RMSE, root mean square error; CORR, correlation coefficient

## References

- Feng, S., Jiang, F., Jiang, Z., Wang, H., Cai, Z., and Zhang, L.: Impact of 3DVAR assimilation of surface PM<sub>2.5</sub> observations on PM<sub>2.5</sub> forecasts over China during wintertime, *Atmospheric Environment*, 187, 34-49, 2018.
- Huang, X., Ding, A., Gao, J., Zheng, B., Zhou, D., Qi, X., Tang, R., Wang, J., Ren, C., Nie, W., Chi, X., Xu, Z., Chen, L., Li, Y., Che, F., Pang, N., Wang, H., Tong, D., Qin, W., Cheng, W., Liu, W., Fu, Q., Liu, B., Chai, F., Davis, S. J., Zhang, Q., and He, K.: Enhanced secondary pollution offset reduction of primary emissions during COVID-19 lockdown in China, *National Science Review*, doi: 10.1093/nsr/nwaa137, 2020. 2020.
- Shi, X. and Brasseur, G. P.: The Response in Air Quality to the Reduction of Chinese Economic Activities During the COVID-19 Outbreak, 47, e2020GL088070, 2020.
- Zheng, B., Zhang, Q., Geng, G., Chen, C., Shi, Q., Cui, M., Lei, Y., and He, K.: Changes in China's anthropogenic emissions and air quality during the COVID-19 pandemic in 2020, *Earth Syst. Sci. Data*, 13, 2895-2907, 2021.
- Zhi, G., Zhang, Y., Sun, J., Cheng, M., Dang, H., Liu, S., Yang, J., Zhang, Y., Xue, Z., Li, S., and Meng, F.: Village energy survey reveals missing rural raw coal in northern China: Significance in science and policy, *Environmental Pollution*, 223, 705-712, 2017.
